# Supplementary material
Source: HighWire-hosted journal article supplement (https://bmjopen.bmj.com/content/11/11/e055003)
Supplement: inline-supplementary-material-1 [file inline-supplementary-material-1.pdf]

**Associations of obesity, physical activity level, inflammation and cardiometabolic health with COVID-19 mortality: a prospective analysis of the UK Biobank cohort**

Malik Hamrouni, Matthew J Roberts, Alice E Thackray, David J Stensel, Nicolette C Bishop

**Supplementary material**

**Supplemental table 1:** Associations of BMI category with COVID-19 mortality after excluding inpatients with a positive SARS-CoV-2 test who did not die from COVID-19 from analysis.

| BMI category | N deaths/N total | COVID-19 mortality<br>Odds ratio (95% CI) |
|--------------|------------------|-------------------------------------------|
| Normal       | 65/87 438        | 1 (ref.)                                  |
| Overweight   | 176/111 415      | 1.38 (1.03 – 1.84)                        |
| Obesity      | 156/58 825       | <b>1.80 (1.33 – 2.43)</b>                 |

Adjusted for baseline age, sex, ethnicity, physical activity level, Townsend deprivation index, smoking status, alcohol intake, educational attainment, number of illnesses, and number of treatments and/or medications taken.

CI, confidence interval; BMI, body mass index

Significant associations ( $p < 0.05$ ) are highlighted in bold.

**Supplemental table 2:** Associations of physical activity level with COVID-19 mortality after excluding inpatients with a positive SARS-CoV-2 test who did not die from COVID-19 from analysis.

| Physical activity level | N deaths/N total | COVID-19 mortality<br>Odds ratio (95% CI) |
|-------------------------|------------------|-------------------------------------------|
| High                    | 138/105 325      | 1 (ref.)                                  |
| Moderate                | 150/104 866      | 1.05 (0.83 – 1.33)                        |
| Low                     | 109/47 487       | <b>1.41 (1.09 – 1.83)</b>                 |

Adjusted for baseline age, sex, ethnicity, BMI, Townsend deprivation index, smoking status, alcohol intake, educational attainment, number of illnesses, and number of treatments and/or medications taken.

CI, confidence interval; BMI, body mass index

Significant associations ( $p < 0.05$ ) are highlighted in bold.

**Supplemental table 3:** Associations of physical activity level with COVID-19 mortality across BMI categories after excluding inpatients with a positive SARS-CoV-2 test who did not die from COVID-19 from analysis.

| Physical activity level | BMI category | N deaths/N total | COVID-19 mortality Odds ratio (95% CI) |
|-------------------------|--------------|------------------|----------------------------------------|
| High                    | Normal       | 27/39 368        | 1 (ref.)                               |
|                         | Overweight   | 71/46 068        | 1.51 (0.97 – 2.36)                     |
|                         | Obesity      | 40/19 889        | 1.62 (0.99 – 2.66)                     |
| Moderate                | Normal       | 22/35 513        | 0.93 (0.53 – 1.64)                     |
|                         | Overweight   | 70/45 647        | 1.53 (0.98 – 2.38)                     |
|                         | Obesity      | 58/23 706        | <b>1.98 (1.24 – 3.15)</b>              |
| Low                     | Normal       | 16/12 557        | <b>1.95 (1.05 – 3.62)</b>              |
|                         | Overweight   | 35/19 700        | <b>1.70 (1.03 – 2.84)</b>              |
|                         | Obesity      | 58/15 230        | <b>2.86 (1.78 – 4.59)</b>              |

Adjusted for baseline age, sex, ethnicity, Townsend deprivation index, smoking status, alcohol intake, educational attainment, number of illnesses, and number of treatments and/or medications taken.

CI, confidence interval; BMI, body mass index

Significant associations ( $p < 0.05$ ) are highlighted in bold.

**Supplemental table 4.** Associations of cardiometabolic and inflammatory biomarkers with COVID-19 mortality after excluding inpatients with a positive SARS-CoV-2 test who did not die from COVID-19 from analysis.

| Biomarker                                       | COVID-19 mortality<br>Odds ratio (95% CI) |
|-------------------------------------------------|-------------------------------------------|
| CRP (mg/L)                                      | 1.01 (0.99 – 1.03)                        |
| Total leukocyte count (10 <sup>9</sup> cells/L) | <b>1.03 (1.01 – 1.05)</b>                 |
| Neutrophil count (10 <sup>9</sup> cells/L)      | <b>1.10 (1.03 – 1.18)</b>                 |
| Lymphocyte count (10 <sup>9</sup> cells/L)      | 1.02 (0.98 – 1.07)                        |
| Monocyte count (10 <sup>9</sup> cells/L)        | <b>1.33 (1.04 – 1.69)</b>                 |
| Total cholesterol (mmol/L)                      | 0.98 (0.89 – 1.07)                        |
| LDL-C (mmol/L)                                  | 0.98 (0.87 – 1.11)                        |
| HDL-C (mmol/L)                                  | 0.99 (0.70 – 1.38)                        |
| TG (mmol/L)                                     | 1.01 (0.92 – 1.11)                        |
| Glucose (mmol/L)                                | 1.05 (1.00 – 1.11)                        |
| HbA1c (mmol/L)                                  | 1.01 (1.00 – 1.02)                        |

Odds ratio (95% confidence intervals) for COVID-19 mortality per one unit increase in each biomarker. Adjusted for baseline age, sex, ethnicity, BMI, physical activity level, Townsend deprivation index, smoking status, alcohol intake, educational attainment, number of illnesses, and number of treatments and/or medications taken.

CI, confidence interval; CRP, C-reactive protein; LDL-C, low-density lipoprotein cholesterol; HDL-C, high-density lipoprotein cholesterol; TG, triglycerides; HbA1c, glycated haemoglobin. Significant associations ( $p < 0.05$ ) are highlighted in bold.

**Supplemental table 5.** Effect of biomarker adjustment on the associations of physical activity level with COVID-19 mortality in individuals with obesity after excluding inpatients with a positive SARS-CoV-2 test who did not die from COVID-19 from analysis.

| Physical activity level | N deaths/N total | COVID-19 mortality<br>Odds ratio (95% CI) |                                     |
|-------------------------|------------------|-------------------------------------------|-------------------------------------|
|                         |                  | Model 1                                   | Model 2                             |
| High                    | 40/19 889        | 1 (ref.)                                  | 1 (ref.)                            |
| Moderate                | 58/23 706        | 1.15<br>(0.71 – 1.84)                     | 1.11<br>(0.69 – 1.78)               |
| Low                     | 58/15 230        | <b>1.76</b><br><b>(1.10 – 2.84)</b>       | <b>1.70</b><br><b>(1.06 – 2.74)</b> |

Model 1: adjusted for baseline age, sex, ethnicity, Townsend deprivation index, smoking status, alcohol intake, educational attainment, number of illnesses, and number of treatments/medications taken.

Model 2: model 1 plus biomarkers associated with COVID-19 mortality: neutrophil count and monocyte count (not adjusted for total leukocyte count to prevent overadjustment).

CI, confidence interval

Significant associations ( $p < 0.05$ ) are highlighted in bold.

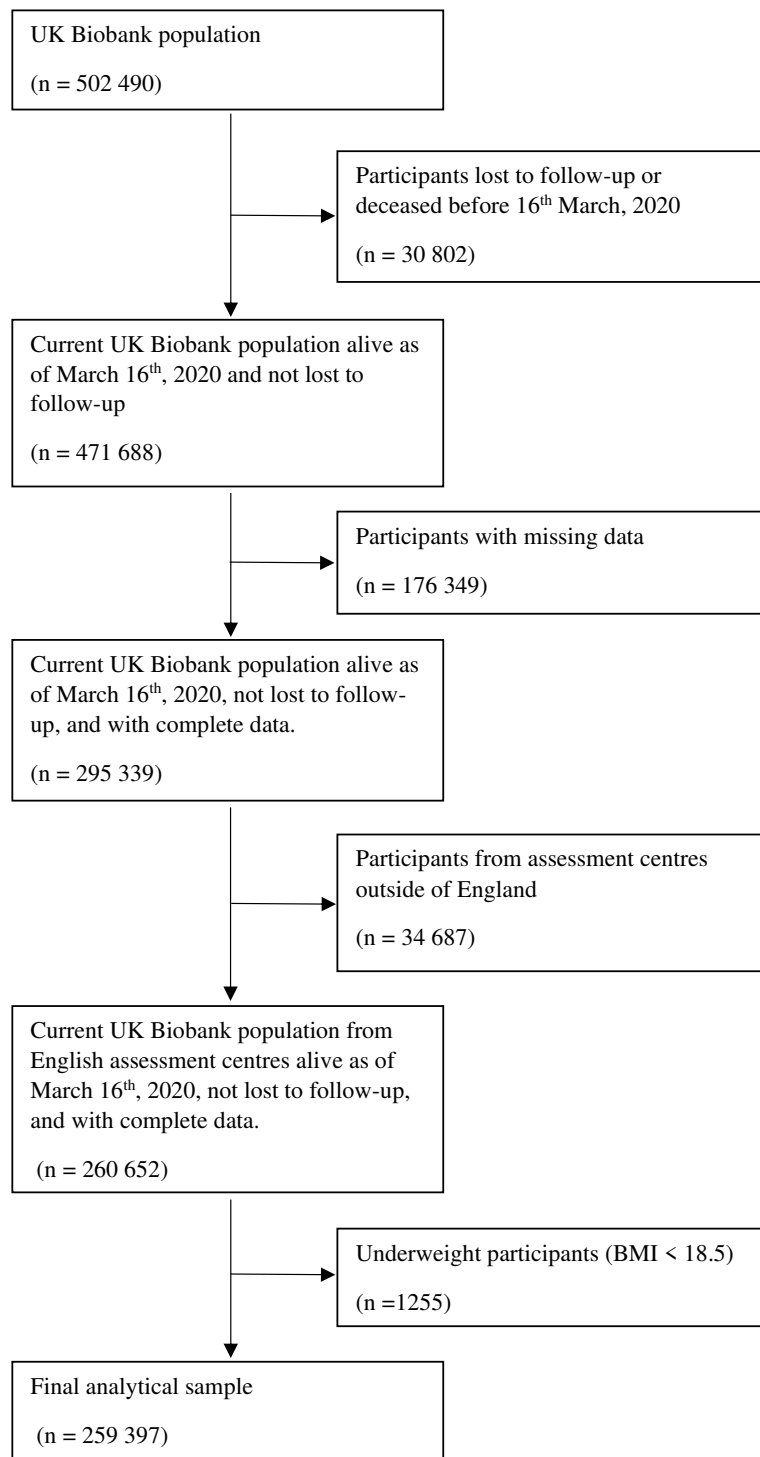

**Figure 1.** Participant flow diagram.
